# Supplementary material
Source: MDPI journal article supplement (https://www.mdpi.com/2073-4344/11/2/242)
Supplement: s1 [file s1]

# A Hybrid Microbial-Enzymatic Fuel Cell Cathode Overcomes Enzyme Inactivation Limits in Biological Fuel Cells

John Parker Evans <sup>1</sup>, Dominic F. Gervasio <sup>2,\*</sup> and Barry M. Pryor <sup>3</sup>

<sup>1</sup> Department of Mechanical and Aerospace Engineering, The Ohio State University, Columbus, OH 43210, USA; evans.2154@osu.edu

<sup>2</sup> Department of Chemical and Environmental Engineering, University of Arizona, Tucson, AZ 85721, USA

<sup>3</sup> Department of Plant Sciences, Division of Plant Pathology, University of Arizona, Tucson, AZ 85721, USA; bmpyor@arizona.edu

\* Correspondence: gervasio@email.arizona.edu; Tel.: +01-520-621-6048

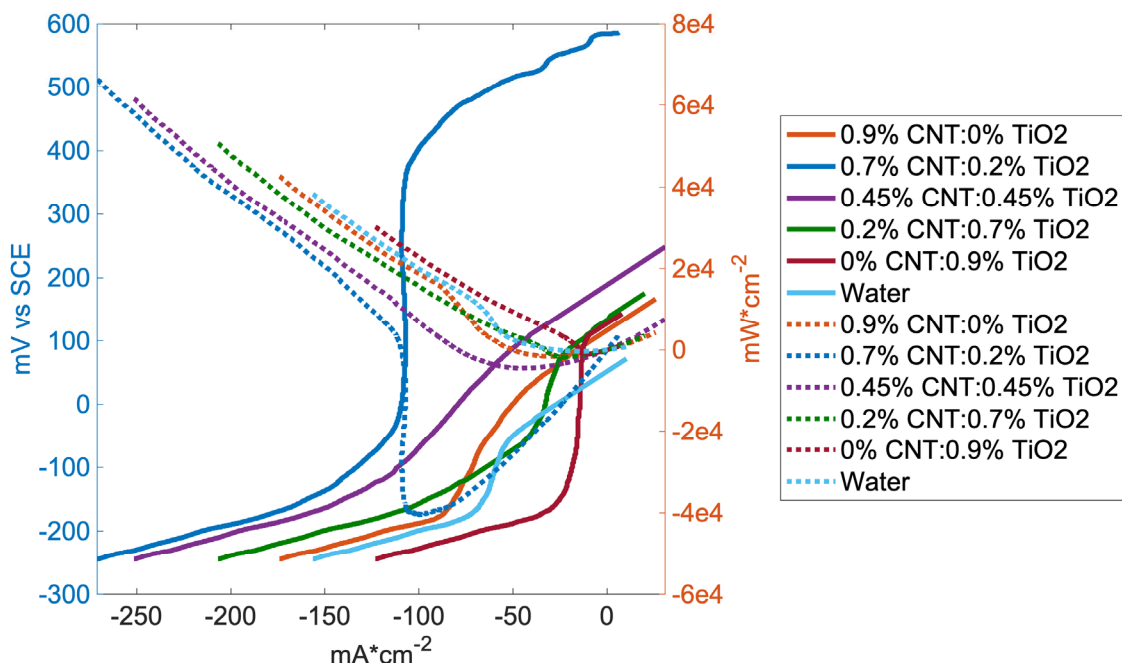

**Figure 1.** Power Density Curves of all coating compositions on spectroscopic carbon rods in 250 mL AGYEB media with 30 U/mL of pure laccase at 25 °C, in air, at 1 atm. Solid lines correspond to the voltage axis on the left and dotted lines to the power axis on the right. Functionalized 0.32 cm × 10 cm spectroscopic carbon rods acted as the working electrode, an unfunctionalized 0.68 cm × 10 cm spectroscopic carbon rod was used as the counter electrode, and a saturated calomel electrode (Gamry, Warminster, PA) was used as the reference electrode in a 250 mL glass electrochemical cell.
